# Supplementary figures and images for: A time resolved metabolomics study: the influence of different carbon sources during growth and starvation of Bacillus subtilis
Source: Royal Society of Chemistry journal article supplement (doi:10.1039/c4mb00112e), 2014-03-25

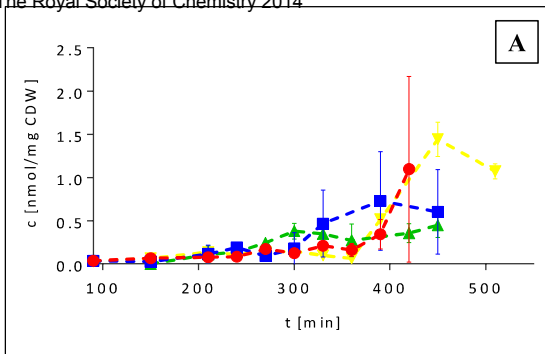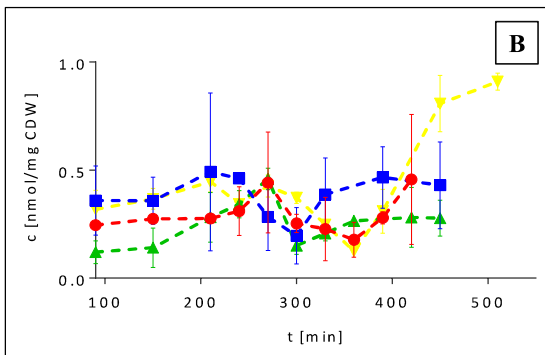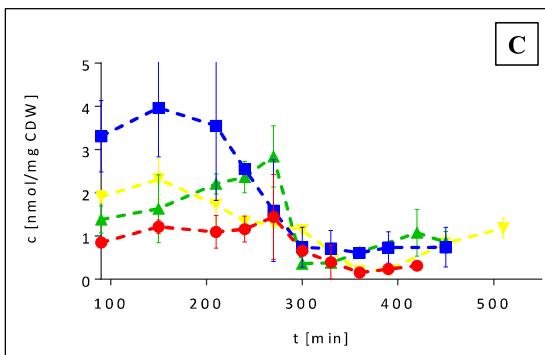

Supplement: c4mb00112e4.pdf [file c4mb00112e4.pdf]
